# Supplementary material
Source: publisher site journal article supplement (https://www.dovepress.com/article/528585)
Supplement: Supplementary file 1 [file Table%20S1.pdf]

**Supplementary Table 1:** Summary of studies examining  $\beta$ 2 microglobulin and survival in patients with renal cell carcinoma

| <b>Variables</b>                  | <b>Palmateer et al., 2025</b>                                   | <b>Lucarelli et al., 2014</b>         | <b>Rasmuson et al., 1995</b>          |
|-----------------------------------|-----------------------------------------------------------------|---------------------------------------|---------------------------------------|
| Population                        | American with local and metastatic RCC                          | Italian with local and metastatic RCC | Swedish with local and metastatic RCC |
| Patient number                    | 429                                                             | 332                                   | 145                                   |
| $\beta$ 2 microglobulin threshold | $\geq 2.34$ mg/L                                                | $> 2.6$ mg/L                          | $\geq 3.0$ mg/L                       |
| Exclusionary criteria             | eGFR $< 15$ mL/min/1.73m <sup>2</sup>                           | eGFR $< 60$ mL/min/1.73m <sup>2</sup> | Cr $< 125$ $\mu$ mol/L                |
| Metastatic disease*               | 162 (37.6)                                                      | 27 (8.1)                              | 56 (38.6)                             |
| Nuclear grade 3-4*                | 314 (80.3)                                                      | 120 (36.2)                            | 107 (73.8)                            |
| pT1-T2                            | 163 (38)                                                        | 254 (76.2)                            | NA                                    |
| Median tumor size                 | 7.5 cm                                                          | 4.5 cm                                | NA                                    |
| Kaplan Meier                      | OS: <b>p &lt; 0.0001</b><br>CSS: <b>p = 0.0005</b>              | CSS: <b>p = 0.001</b><br>PFS: 0.06    | OS: <b>p = 0.001</b>                  |
| MVA                               | OS: HR 1.58, <b>p = 0.035</b><br>CSS: HR 2.08, <b>p = 0.009</b> | CSS: p = 0.97<br>PFS: p = 0.51        | OS: HR 1.26, p = 0.39                 |

\*reported as n(%). Statistically significant parametric p-values ( $< 0.05$ ) are bolded. Abbreviations: renal cell carcinoma (RCC), estimated glomerular filtration rate (eGFR), overall survival (OS), cancer-specific survival (CSS), progression-free survival (PFS)
